# Supplementary material for: Effect of high-amylosestarch branching enzyme IIwheat mutants on starch digestibility in bread, product quality, postprandial satiety and glycaemic response
Source: Royal Society of Chemistry journal article supplement (doi:10.1039/d1fo03085j), 2022-01-01
Supplement: d1fo03085j1.pdf [file d1fo03085j1.pdf]

**Effect of high-amylose starch branching enzyme II wheat mutants on starch digestibility in bread, product quality, postprandial satiety and glycaemic response.**

Marina Corrado<sup>i</sup>, Jennifer H. Ahn-Jarvis<sup>1</sup>, Brendan Fahy<sup>ii</sup>, George M. Savva<sup>1</sup>, Cathrina H. Edwards<sup>1</sup> <sup>✉\*</sup> and Brittany A. Hazard<sup>1</sup> <sup>2✉</sup>

**Source data**

*Table 1. Capillary glucose concentrations REST study*

| <b>Capillary glucose concentrations after consuming <i>sbell</i> bread</b> |                   |     |     |     |     |     |     |     |     |     |     |
|----------------------------------------------------------------------------|-------------------|-----|-----|-----|-----|-----|-----|-----|-----|-----|-----|
| <b>Participant ID</b>                                                      | <b>Time (min)</b> |     |     |     |     |     |     |     |     |     |     |
|                                                                            | 0                 | 15  | 30  | 45  | 60  | 75  | 90  | 120 | 150 | 180 | 210 |
| 1                                                                          | 4.9               | 6.7 | 6.7 | 6.8 | 7   | 6.4 | 6.7 | 5.8 | 5.9 | 6.3 | 5.3 |
| 2                                                                          | 4.9               | 4.9 | 6.7 | 7.1 | 6   | 5.8 | 5.2 | 5.3 | 5.1 | 5.8 | 5   |
| 3                                                                          | 4.8               | 4.8 | 4.9 | 5.9 | 5.7 | 5.2 | 5.8 | 5.3 | 5.5 | 5.3 | 5.4 |
| 4                                                                          | 5.2               | 5.4 | 6.9 | 6.9 | 6.1 | 6   | 6.1 | 5.9 | 5.5 | 4.8 | 4.8 |
| 5                                                                          | 5.2               | 5.9 | 8.3 | 7.7 | 7.2 | 6.6 | 6.7 | 6   | 5.2 | 5   | 4.8 |
| 6                                                                          | 5.1               | 6.3 | 7.6 | 6.2 | 6.6 | 5.5 | 5.2 | 6.2 | 5.2 | 5   | 4.8 |
| 7                                                                          | 4.9               | 5.3 | 6.6 | 6.8 | 5.3 | 5   | 4.8 | 5.7 | 5.7 | 5.5 | 4.8 |
| 8                                                                          | 5.9               | 6.4 | 7.1 | 6.5 | 6.7 | 6.3 | 6.3 | 7.2 | 6.4 | 5.8 | 5.3 |

  

| <b>Capillary glucose concentrations after consuming WT bread</b> |                   |     |     |     |     |     |     |     |     |     |     |
|------------------------------------------------------------------|-------------------|-----|-----|-----|-----|-----|-----|-----|-----|-----|-----|
| <b>Participant ID</b>                                            | <b>Time (min)</b> |     |     |     |     |     |     |     |     |     |     |
|                                                                  | 0                 | 15  | 30  | 45  | 60  | 75  | 90  | 120 | 150 | 180 | 210 |
| 1                                                                | 5.4               | 5.3 | 7.4 | 6.5 | 8.2 | 6.5 | 6.4 | 6.5 | 5.3 | 5.2 | 5.2 |
| 2                                                                | 4.7               | 5   | 6.2 | 6.3 | 5.2 | 5.2 | 5.3 | 5.9 | 5.3 | 6.8 | 5.4 |
| 3                                                                | 4.8               | 4.9 | 5.4 | 5.9 | 6.2 | 5.5 | 5.4 | 6.4 | 5.4 | 5.2 | 5   |
| 4                                                                | 5.6               | 5.5 | 7   | 7.4 | 7.8 | 6.5 | 6.5 | 7.2 | 5.7 | 5.2 | 5.2 |
| 5                                                                | 5.1               | 5.2 | 8   | 8   | 7.7 | 7.3 | 6.6 | 5.8 | 5   | 4.4 | 4.2 |
| 6                                                                | 4.8               | 6   | 6.6 | 6.2 | 6   | 5.7 | 5.7 | 5   | 4.8 | 4.7 | 4.3 |
| 7                                                                | 4.6               | 4.9 | 7.2 | 7   | 6.2 | 5.8 | 5.6 | 5.9 | 5.2 | 5   | 4.5 |
| 8                                                                | 5.3               | 6.3 | 7.9 | 7.5 | 6.3 | 6.2 | 6.6 | 6.3 | 6.2 | 6.2 | 5.2 |

Time = 0 is the average of three measurements collected at -15 min, -10 min, -5 min (before starting to eat the test meal)

Table 2. Interstitial glucose concentrations REST study (shell bread)

| Interstitial glucose concentrations after consuming <i>shell</i> bread |        |            |     |     |     |     |     |     |     |     |     |     |     |     |     |     |     |     |
|------------------------------------------------------------------------|--------|------------|-----|-----|-----|-----|-----|-----|-----|-----|-----|-----|-----|-----|-----|-----|-----|-----|
| Participant ID                                                         | Sensor | Time (min) |     |     |     |     |     |     |     |     |     |     |     |     |     |     |     |     |
|                                                                        | A      | 0          | 15  | 30  | 45  | 60  | 75  | 90  | 105 | 120 | 135 | 150 | 165 | 180 | 195 | 210 | 225 | 240 |
| 1                                                                      | A      | 5.2        | 5.4 | 6.3 | 6.9 | 6.9 | 6.6 | 6.2 | 6.1 | 6.1 | 5.9 | 5.6 | 5.6 | 5.6 | 5.6 | 5.4 | 5.2 | 5.1 |
| 2                                                                      | A      | 4.3        | 4.4 | 4.9 | 5.8 | 5.8 | 5.3 | 5   | 5   | 5.1 | 5.2 | 5.2 | 4.9 | 4.8 | 4.9 | 4.8 | 4.6 | 4.4 |
| 3                                                                      | A      | 4.1        | 4.3 | 4.7 | 5.2 | 5.2 | 4.7 | 4.4 | 4.6 | 4.7 | 4.8 | 4.8 | 5   | 4.9 | 4.7 | 4.7 | 4.8 | 4.7 |
| 4                                                                      | A      | 4.4        | 4.7 | 5.6 | 6.1 | 5.8 | 5.3 | 5.3 | 5.6 | 5.6 | 5.2 | 4.9 | 4.7 | 4.6 | 4.4 | 4.3 | 4.2 | 4.1 |
| 5                                                                      | A      | 4.7        | 4.6 | 5.7 | 7.6 | 7.9 | 7.1 | 6.7 | 6.5 | 5.9 | 4.8 | 4.2 | 4.3 | 4.2 | 3.8 | 3.6 | 3.4 | 3.4 |
| 6                                                                      | A      | 4.6        | 4.4 | 5   | 5.9 | 6.1 | 5.7 | 5.3 | 4.9 | 4.9 | 5.1 | 4.9 | 4.8 | 4.7 | 4.6 | 4.6 | 4.5 | 4.4 |
| 7                                                                      | A      | 4.7        | 4.7 | 5.4 | 6   | 5.6 | 4.8 | 4.6 | 5   | 5.5 | 5.8 | 5.7 | 5.3 | 5.2 | 5   | 4.7 | 4.4 | 4.2 |
| 8                                                                      | A      | 5.0        | 5.9 | 6.8 | 6.6 | 5.9 | 5.7 | 5.8 | 6.2 | 6.4 | 6.1 | 5.7 | 5.6 | 5.3 | 5.2 | 5.1 | 4.9 | 4.9 |
| 1                                                                      | B      | 4.9        | 5.2 | 6   | 6.4 | 6.4 | 6.2 | 5.9 | 5.8 | 5.7 | 5.5 | 5.3 | 5.3 | 5.3 | 5.3 | 5.1 | 5.1 | 4.9 |
| 2                                                                      | B      | 4.9        | 4.8 | 5.3 | 6.7 | 7   | 6.1 | 5.5 | 5.6 | 5.8 | 5.9 | 5.8 | 5.4 | 5.2 | 5.6 | 5.5 | 5.1 | 4.9 |
| 3                                                                      | B      | 5.2        | 5.1 | 5.4 | 5.9 | 6.2 | 5.8 | 5.4 | 5.6 | 5.7 | 5.7 | 5.8 | 5.9 | 5.9 | 5.8 | 5.8 | 5.7 | 5.8 |
| 4                                                                      | B      | 4.1        | 4.2 | 4.6 | 5.3 | 5.5 | 5.2 | 5.2 | 5.4 | 5.3 | 5.1 | 4.8 | 4.6 | 4.4 | 4.3 | 4.2 | 4   | 3.9 |
| 5                                                                      | B      | 5.1        | 5.4 | 6.9 | 8.6 | 8.4 | 7.4 | 7.1 | 7   | 6.3 | 5.1 | 4.7 | 4.7 | 4.4 | 4.1 | 4   | 4.1 | 4.1 |
| 6                                                                      | B      | 4.6        | 4.6 | 4.7 | 5.2 | 5.8 | 5.9 | 5.6 | 5.3 | 5.1 | 5   | 5.1 | 4.8 | 4.7 | 4.6 | 4.6 | 4.6 | 4.6 |
| 7                                                                      | B      | 4.7        | 4.7 | 5   | 5.7 | 5.9 | 5.4 | 4.9 | 5   | 5.2 | 5.6 | 5.9 | 5.9 | 5.7 | 5.4 | 5.1 | 4.7 | 4.6 |
| 8                                                                      | B      | 5.2        | 5.1 | 5.8 | 6.7 | 6.7 | 6   | 5.7 | 5.7 | 6.2 | 6.4 | 6.2 | 5.8 | 5.7 | 5.5 | 5.3 | 5.2 | 5.1 |

Time = 0 is the average of three measurements collected at -30 min, -15 min, 0 min (before starting to eat the test meal)

Table 3. Interstitial glucose concentrations REST study (WT bread)

| Interstitial glucose concentrations after consuming WT bread |        |            |     |     |     |     |     |     |     |     |     |     |     |     |     |     |     |     |
|--------------------------------------------------------------|--------|------------|-----|-----|-----|-----|-----|-----|-----|-----|-----|-----|-----|-----|-----|-----|-----|-----|
| Participant ID                                               | Sensor | Time (min) |     |     |     |     |     |     |     |     |     |     |     |     |     |     |     |     |
|                                                              | A      | 0          | 15  | 30  | 45  | 60  | 75  | 90  | 105 | 120 | 135 | 150 | 165 | 180 | 195 | 210 | 225 | 240 |
| 1                                                            | A      | n/a        | n/a | n/a | n/a | n/a | n/a | n/a | n/a | n/a | n/a | n/a | n/a | n/a | n/a | n/a | n/a | n/a |
| 2                                                            | A      | n/a        | n/a | n/a | n/a | n/a | n/a | n/a | n/a | n/a | n/a | n/a | n/a | n/a | n/a | n/a | n/a | n/a |
| 3                                                            | A      | 4.4        | 4.7 | 5.1 | 5.4 | 5.3 | 5   | 5.1 | 5.2 | 5.1 | 4.9 | 4.8 | 4.8 | 4.7 | 4.6 | 4.7 | 5.1 | 5.3 |
| 4                                                            | A      | 4.8        | 5.2 | 6.1 | 6.9 | 6.8 | 6.3 | 6.1 | 6.3 | 6.6 | 6.2 | 5.6 | 5.1 | 4.9 | 4.7 | 4.6 | 4.4 | 4.4 |
| 5                                                            | A      | 5.4        | 5.7 | 7.6 | 8.8 | 7.7 | 6.8 | 6.8 | 6.4 | 6.1 | 5.5 | 5.1 | 5   | 5   | 4.9 | 4.8 | 4.8 | 4.8 |
| 6                                                            | A      | 5.0        | 5.4 | 6.4 | 6.9 | 6.1 | 5.6 | 5.8 | 5.8 | 5.6 | 5.1 | 4.8 | 4.7 | 4.4 | 4.6 | 4.8 | 4.9 | 4.8 |
| 7                                                            | A      | 4.6        | 4.9 | 6.3 | 7.4 | 6.8 | 5.7 | 5.4 | 5.9 | 6.1 | 6.1 | 5.8 | 5.4 | 5.2 | 4.8 | 4.4 | 4.2 | 4.1 |
| 8                                                            | A      | 5.0        | 5.2 | 6.4 | 7.2 | 6.4 | 5.6 | 5.7 | 5.9 | 5.8 | 5.9 | 6   | 6.1 | 6.1 | 5.6 | 4.8 | 4.4 | 4.3 |
| 1                                                            | B      | 3.2        | 3.3 | 4.6 | 5.5 | 5.4 | 4.9 | 4.4 | 4.4 | 4.4 | 4.1 | 3.6 | 3.3 | 3.2 | 3.2 | 3.1 | 2.9 | 2.7 |
| 2                                                            | B      | 4.9        | 4.7 | 5.1 | 5.9 | 6.6 | 6.1 | 5.4 | 5.7 | 6.1 | 6   | 5.8 | 5.6 | 5.5 | 5.9 | 5.9 | 5.4 | 5   |
| 3                                                            | B      | 5.1        | 5.1 | 5.4 | 5.9 | 6.2 | 5.8 | 5.6 | 5.7 | 5.8 | 5.7 | 5.6 | 5.4 | 5.3 | 5.2 | 5.1 | 5.4 | 5.7 |
| 4                                                            | B      | 3.2        | 3.2 | 3.6 | 4.6 | 5   | 4.5 | 4.1 | 4.2 | 4.5 | 4.5 | 3.8 | 3.4 | 3.2 | 3.1 | 2.9 | 2.8 | 2.8 |
| 5                                                            | B      | 5.5        | 6.1 | 7.9 | 8.7 | 7.4 | 6.8 | 6.8 | 6.4 | 6.2 | 5.5 | 5.1 | 5.2 | 5.2 | 5.1 | 4.9 | 4.9 | 5.1 |
| 6                                                            | B      | 4.7        | 4.9 | 5.7 | 6.4 | 6.3 | 5.8 | 5.6 | 5.5 | 5.4 | 5.2 | 4.8 | 4.6 | 4.4 | 4.3 | 4.3 | 4.4 | 4.6 |
| 7                                                            | B      | 4.8        | 4.8 | 5.6 | 6.8 | 7.1 | 6.3 | 5.6 | 5.7 | 6.1 | 6.1 | 6.1 | 5.7 | 5.3 | 5.1 | 4.8 | 4.6 | 4.3 |
| 8                                                            | B      | 5.0        | 5.3 | 6.3 | 6.8 | 6.2 | 5.7 | 5.7 | 5.9 | 5.9 | 5.9 | 6.1 | 6.2 | 6.2 | 5.7 | 4.9 | 4.5 | 4.3 |

Time = 0 is the average of three measurements collected at -30 min, -15 min, 0 min (before starting to eat the test meal)

<sup>i</sup> Food Innovation and Health, Quadram Institute Bioscience, Norwich Research Park, UK

<sup>ii</sup> Designing Future Wheat and Molecules from Nature, John Innes Centre, Norwich Research Park, UK

<sup>¥</sup> These authors contributed equally.
